# Supplementary material for: Conjugated molecule based 2D perovskites for high-performance perovskite solar cells
Source: Royal Society of Chemistry journal article supplement (doi:10.1039/d1ta05934c), 2021-01-01
Supplement: d1ta05934c1.pdf [file d1ta05934c1.pdf]

## Supporting Information

### Conjugated Molecules Based 2D Perovskites for High-Performance Perovskite Solar Cells

Tao Zhu,<sup>1</sup> Lening Shen,<sup>1</sup> Hanlin Chen,<sup>1</sup> Yongrui Yang,<sup>1</sup> Luyao Zheng,<sup>1</sup> Rui Chen,<sup>1</sup> Jie Zheng,<sup>2</sup> Junpeng Wang\*,<sup>1</sup> and Xiong Gong\*,<sup>1</sup>

1) School of Polymer Science and Polymer Engineering, 2) Department of Chemical, Biomolecular and Corrosion Engineering, College of Engineering and Polymer Science, The University of Akron, Akron, OH 44325, USA

**SI 1. Synthesis and characterization of PPA**

**SI 2. The PL characterization**

**SI 3. The C-V characteristics of perovskite thin film**

**KEYWORDS:** 2D perovskites, conjugated organic molecule, organic spacer, perovskite solar cells, efficiency, and stability

\*Corresponding authors, e-mails: [xgong@uakron.edu](mailto:xgong@uakron.edu) (XG); [jwang6@uakron.edu](mailto:jwang6@uakron.edu) (JPW); Fax: (330) 9723406

## SI 1. Synthesis and characterization of PPA

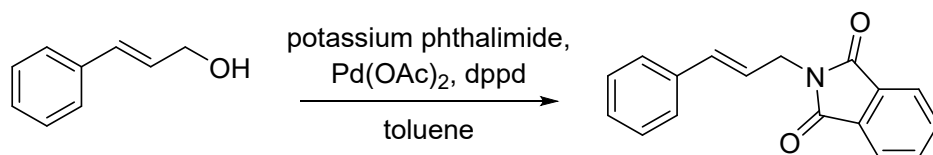

**Scheme 1.** Synthetic steps of 2-cinnamylisoindoline-1,3-dione

**Scheme 1** describes the synthetic steps of 2-cinnamylisoindoline-1,3-dione. In an oven dried Schlenk flask was charged cinnamyl alcohol (1.0 equiv., 10 mmol, 1.34 g), potassium phthalimide (1.0 equiv., 10 mmol, 1.47 g), palladium acetate (0.025 equiv., 0.25 mmol, 94.8 g), dppd (0.05 equiv., 0.5 mmol, 213.2 mg) and 20 mL toluene. After three cycles of freeze-pump-thaw, the mixture was heated under 100 °C for 24 h. Toluene was removed by rotary evaporation and the residual was subjected to column chromatography, affording 2-cinnamylisoindoline-1,3-dione.

<sup>1</sup>H NMR (300 MHz, CDCl<sub>3</sub>) spectrum for 2-cinnamylisoindoline-1,3-dione is shown in **Scheme 2**. <sup>1</sup>H NMR (300 MHz, CDCl<sub>3</sub>, ppm): δ 7.80 (ddd, *J* = 43.0, 5.5, 3.1 Hz, 4H), 7.39-7.18 (m, 5H), 6.66 (d, *J* = 16.1 Hz, 1H), 6.26 (dt, *J* = 15.8, 6.4 Hz, 1H), 4.50-4.39 (dd, *J* = 6.5, 1.2 Hz, 2H).

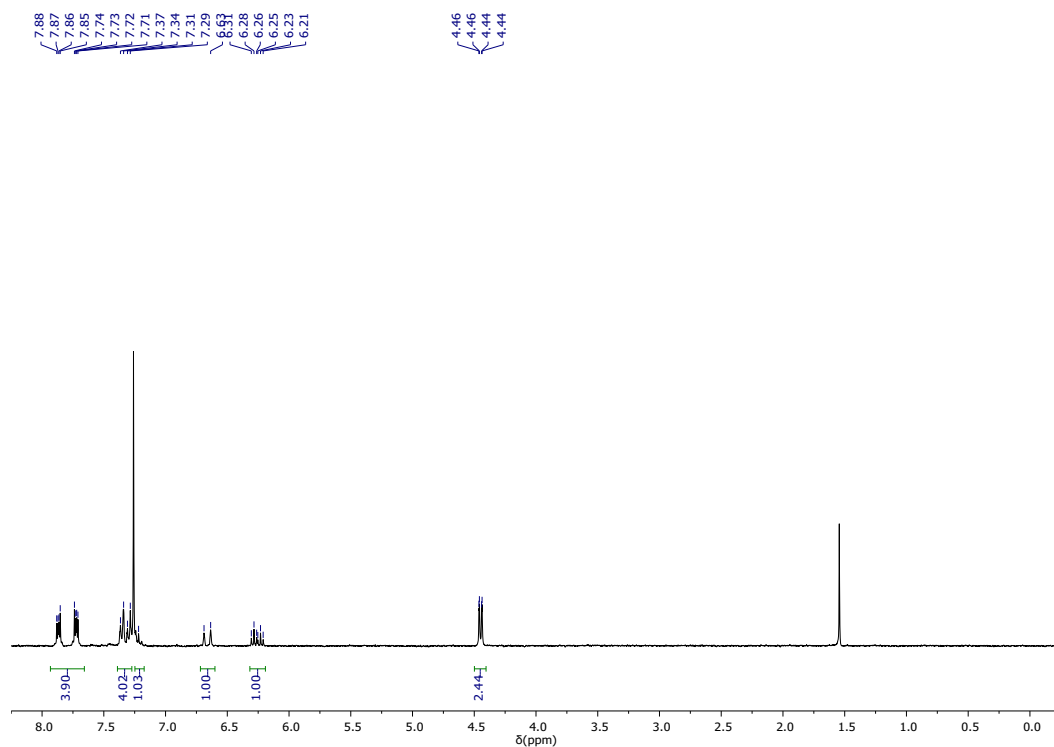

**Scheme 2.**  $^1\text{H}$  NMR (300 MHz,  $\text{CDCl}_3$ ) spectrum for 2-cinnamylisoindoline-1,3-dione.

**Scheme 3 displays synthetic steps of PPA.** In a round bottom flask was charged 2-cinnamylisoindoline-1,3-dione (1.0 equiv., 1.0 mmol, 263.3 mg), hydrazine hydrate (50%~60% hydrazine, 3.0 equiv., 3.0 mmol, 187  $\mu\text{L}$ ) and MeOH (3 mL). After refluxing overnight, the mixture was cooled down, and to it were added 5 mL DCM and 5 mL 1 M NaOH(aq). The mixture was stirred for an additional 30 min. The mixture was extracted with DCM and the combined organic phase was then washed with water and brine and dried over sodium sulfate. Preparative Gel Permeation Chromatography was performed for purification to render 3-phenyl-2-propen-1-amine.

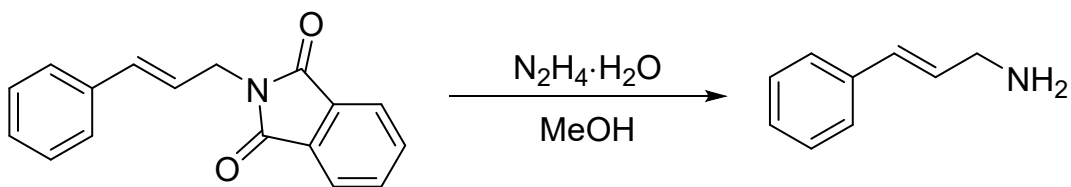

**Scheme 3.** Synthetic steps of PPA

Scheme 4 shows the  $^1\text{H}$  NMR results of PPA.  $^1\text{H}$  NMR (500 MHz,  $\text{CDCl}_3$ , ppm):  $\delta$  7.39-7.35 (m, 2H), 7.31 (t,  $J = 7.6$  Hz, 2H), 7.24-7.19 (m, 1H), 6.51 (d,  $J = 15.9$  Hz, 1H), 6.33 (dt,  $J = 15.9$ , 5.9 Hz, 1H), 3.51-3.46 (dd,  $J = 5.9$ , 1.5 Hz, 2H), 1.40-1.05 (br, 2H).

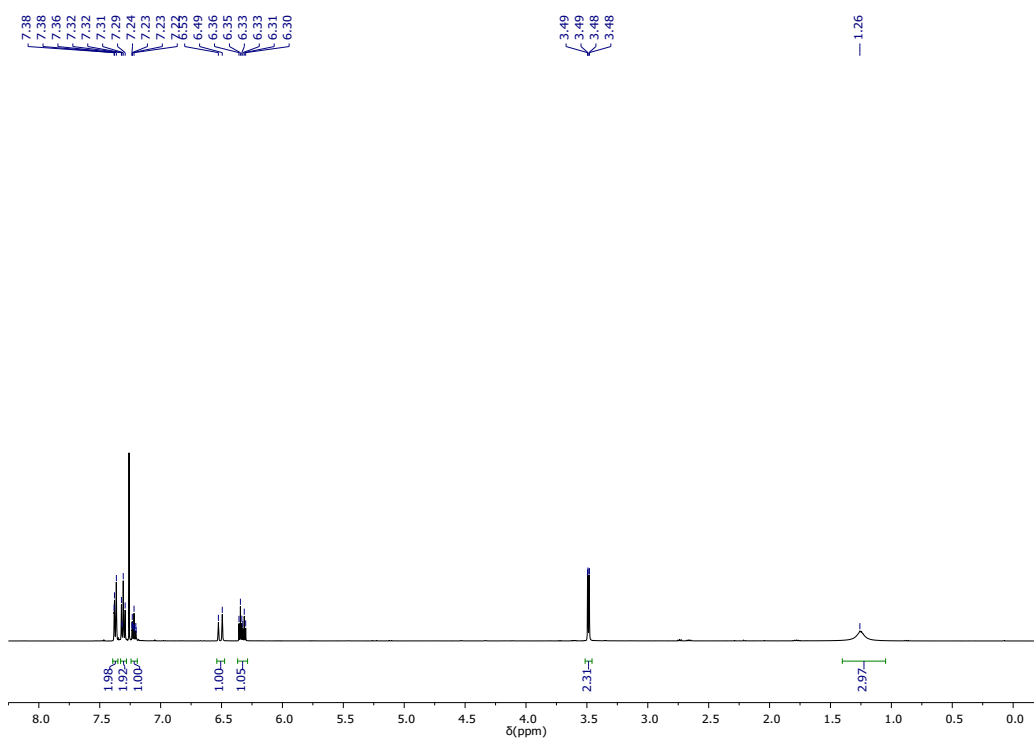

**Scheme 4 .**  $^1\text{H}$  NMR (500 MHz,  $\text{CDCl}_3$ ) spectrum for 3-phenyl-2-propen-1-amine.

## SI 2. The PL characterization

**Fig. S1** displays the photoluminescence (PL) spectra of MAPbI<sub>3</sub> thin film and the (PPA)<sub>x</sub>(MAPbI<sub>3</sub>)<sub>1-x</sub>/MAPbI<sub>3</sub> bilayer thin film coated on the top of quartz. The PL intensity increased obviously in the (PPA)<sub>x</sub>(MAPbI<sub>3</sub>)<sub>1-x</sub>/MAPbI<sub>3</sub> bilayer thin film, implying that non-radiative recombination within the (PPA)<sub>x</sub>(MAPbI<sub>3</sub>)<sub>1-x</sub>/MAPbI<sub>3</sub> bilayer thin film was significantly suppressed.

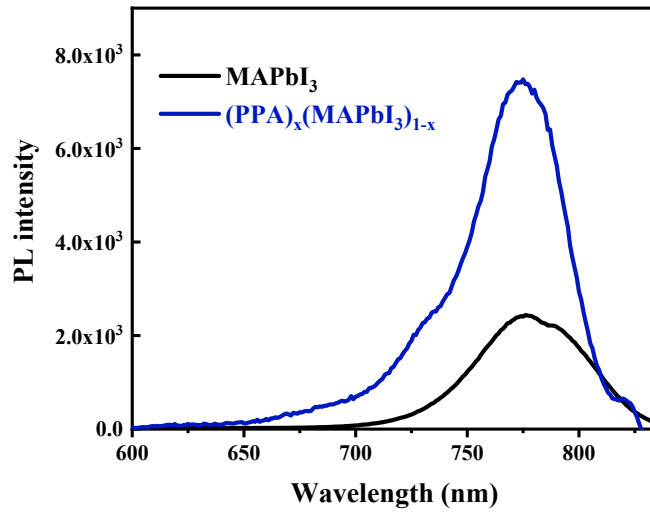

**Fig. S1.** The PL spectra of MAPbI<sub>3</sub> and the (PPA)<sub>x</sub>(MAPbI<sub>3</sub>)<sub>1-x</sub>/MAPbI<sub>3</sub> thin films from front side.

### SI 3. The capacitance versus frequency characteristics of perovskite thin film

The capacitance versus frequency characteristics of photodiodes with a device structure of ITO/perovskite active layer/Al, where the active layer is either the  $(\text{PPA})_x(\text{MAPbI}_3)_{1-x}/\text{MAPbI}_3$  bilayer thin film or  $\text{MAPbI}_3$  thin film are **Fig. S2**). The  $\varepsilon$  is the dielectric constant for perovskite

thin film is described by:  $C = \varepsilon\varepsilon_0\frac{A}{d}$  (where A is the device area and d is the film thickness of perovskite thin film) [41-44]). Thus, the  $\varepsilon$  values are calculated to be 26.6 and 25.4 for the  $(\text{PPA})_x(\text{MAPbI}_3)_{1-x}/\text{MAPbI}_3$  bilayer thin film and  $\text{MAPbI}_3$  thin film, respectively.

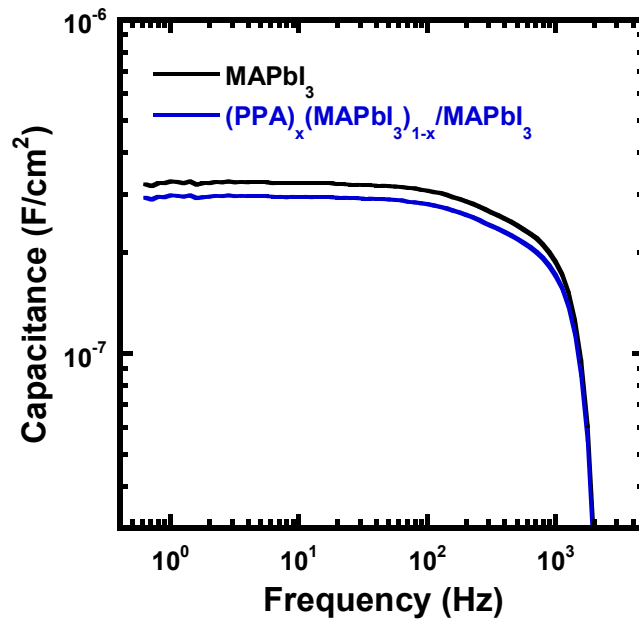

Fig. S2. The C-V characteristics of perovskite thin films
